# Supplementary material for: Genome-wide identification of MST, SUT and SWEET family sugar transporters in root parasitic angiosperms and analysis of their expression during host parasitism
Source: BMC Plant Biol. 2019 May 14;19:196. doi: 10.1186/s12870-019-1786-y (PMC6515653; doi:10.1186/s12870-019-1786-y)
Supplement: Supplementary file 15 — The species to which orthogroups are most frequently associated. Note the differences between the raw number of members in a certain orthogroup versus the percentage of sequences from a species that are members of that orthogroup. (XLSX 13 kb) [file 12870_2019_1786_MOESM15_ESM.xlsx]

## Sheet: Sheet1
						Outgroup					Percentage of Instances in Species				Species of Most Frequent Occurrence
Family		Triphysaria	Striga	Mimulus	Phelipanche	Arabidopsis	Physcomitrella	Selaginella	Amborella	Rice	Triphysaria	Striga	Mimulus	Phelipanche	Raw Number	Percentage
MST	Group_113	153	187	105	48	10	0	0	0	0	24.9186	28.5933	21.1694	12.766	Striga	Striga
	Group_1299	27	14	24	12	0	0	0	0	0	4.39739	2.14067	4.83871	3.19149	Triphysaria	Mimulus
	Group_8494	7	11	22	10	0	0	0	0	0	1.14007	1.68196	4.43548	2.65957	Mimulus	Mimulus
	Group_6942	18	22	15	23	0	0	0	0	0	2.9316	3.36391	3.02419	6.11702	Phelipanche	Phelipanche
	Group_18353	7	15	21	12	0	0	0	0	0	1.14007	2.29358	4.23387	3.19149	Mimulus	Mimulus
	Group_555	199	170	48	61	9	0	0	0	0	32.4104	25.9939	9.67742	16.2234	Triphysaria	Triphysaria
	Group_3460	8	7	19	0	0	0	0	0	0	1.30293	1.07034	3.83065	0	Mimulus	Mimulus
	Group_1358	39	31	53	86	14	0	0	0	0	6.35179	4.74006	10.6855	22.8723	Phelipanche	Phelipanche
	Group_1739	24	54	56	21	13	0	0	0	0	3.90879	8.25688	11.2903	5.58511	Mimulus	Mimulus
	Group_2322	21	46	34	22	0	0	0	0	0	3.4202	7.03364	6.85484	5.85106	Striga	Striga
	Group_477	40	36	32	30	9	0	0	0	0	6.51466	5.50459	6.45161	7.97872	Triphysaria	Phelipanche
	Group_6054	9	20	10	6	0	0	0	0	0	1.4658	3.0581	2.01613	1.59574	Striga	Striga
	Group_2753	28	20	20	20	11	0	0	0	0	4.56026	3.0581	4.03226	5.31915	Triphysaria	Phelipanche
	Group_3013	23	10	10	12	10	0	0	0	0	3.74593	1.52905	2.01613	3.19149	Triphysaria	Triphysaria
	Group_1663	11	11	27	13	11	0	0	0	0	1.79153	1.68196	5.44355	3.45745	Mimulus	Mimulus
	Total	614	654	496	376
SUT	Group_4436	0	0	0	0	0	11	0	0	0	0	0	0	0	Arabidopsis, Rice or Outgroup	Arabidopsis, Rice or Outgroup
	Group_1653	0	0	0	0	0	0	14	0	0	0	0	0	0	Arabidopsis, Rice or Outgroup	Arabidopsis, Rice or Outgroup
	Group_1369	0	0	0	0	0	0	0	10	0	0	0	0	0	Arabidopsis, Rice or Outgroup	Arabidopsis, Rice or Outgroup
	Group_1431	36	80	30	27	22	0	0	0	0	73.4694	86.0215	71.4286	77.1429	Striga	Striga
	Group_3807	13	13	12	8	12	0	0	0	22	26.5306	13.9785	28.5714	22.8571	Triphysaria	Mimulus
	Total	49	93	42	35
SWEET	Group_429	26	55	72	31	43	0	0	0	25	39.3939	42.9688	52.5547	37.3494	Mimulus	Mimulus
	Group_3205	14	19	27	17	5	0	0	0	6	21.2121	14.8438	19.708	20.4819	Mimulus	Triphysaria
	Group_769	21	36	17	30	23	5	4	5	23	31.8182	28.125	12.4088	36.1446	Striga	Phelipanche
	Group_3725	5	9	7	5	5	0	0	0	4	7.57576	7.03125	5.10949	6.0241	Striga	Triphysaria
	Group_2089	0	9	9	0	11	0	0	0	7	0	7.03125	6.56934	0	Striga	Striga
	Group_5750	0	0	5	0	5	0	0	0	5	0	0	3.64964	0	Mimulus	Mimulus
	Group_16676	0	0	0	0	0	0	0	0	6	0	0	0	0	Arabidopsis, Rice or Outgroup	Arabidopsis, Rice or Outgroup
	Total	66	128	137	83
