# Supplementary material for: Genome-wide identification of MST, SUT and SWEET family sugar transporters in root parasitic angiosperms and analysis of their expression during host parasitism
Source: BMC Plant Biol. 2019 May 14;19:196. doi: 10.1186/s12870-019-1786-y (PMC6515653; doi:10.1186/s12870-019-1786-y)
Supplement: Supplementary file 18 — The names of the genes on the phylogenetic trees, and their FASTA file aliases. The names as they appear in Figs. 1, 2, 3, 4 and 5 and in Additional files 1, 2, 3, 4, 5 and 7, 8, 9 are shorthand labels that show the species (e.g., Striga hermonthica is shortened to StHe), the clade, and an arbitrarily given number. (XLSX 17 kb) [file 12870_2019_1786_MOESM18_ESM.xlsx]

## Sheet: Sheet1
Name on Tree	Sequence Name on File			Name on Tree	Sequence Name on File		Name on Tree	Sequence Name on File
SeMoSV2	81650_SMoellendorffii			AtSUC8	AT2G14670.1_ATSUC8		AmTrSWEETII.1	evm 27.model.AmTr v1.0 scaffold00058.151
AmTrOCC3	evm_27.model.AmTr_v1.0_scaffold00032.165			MiGuSUT1.1	Migut.C01230.1.p		AtSWEET1	AT1G21460.1_AtSWEET1
PpOCC4	Pp3c21_18700V3.1			MiGuSUT1.2	Migut.C01231.1.p		AtSWEET10	AT5G50790.1_AtSWEET10
AtTMT1	AT1G20840.2_AtTMT1			PhAeSUT1.1	PhAeBC6_p_c20246_g0_i2		AtSWEET11	AT3G48740.1_AtSWEET11
MiGuTMT1	Migut.H02215.1.p			PhAeSUT1.2	PhAeBC6_p_c21860_g22763_i1		AtSWEET12	AT5G23660.1_AtSWEET12
MiGuTMT2	Migut.N01360.1.p			StHeSUT1.1	StHeBC4_p_c12903_g1054_i1		AtSWEET13	AT5G50800.1_AtSWEET13
MiGuTMT3	Migut.O00311.1.p			StHeSUT1.2	StHeBC4_p_c12903_g15241_i2		AtSWEET14	AT4G25010.1_AtSWEET14
MiGuTMT4	Migut.O00312.1.p			StHeSUT1.3	StHeBC4_p_c12903_g18438_i1		AtSWEET15	AT5G13170.1_AtSWEET15
PhAeTMT1	PhAeBC6_h_c21527_g0_i4			StHeSUT1.4	StHeBC4_p_c12903_g30707_i1		AtSWEET16	AT3G16690.3_AtSWEET16
PhAeTMT2	PhAeBC6_p_c21860_g22661_i1			StHeSUT1.5	StHeBC4_p_c23030_g0_i2		AtSWEET17	AT4G15920.1_AtSWEET17
PhAeTMT3	PhAeBC6_p_c21860_g22662_i1			TrVeSUT1.1	TrVeBC4_p_c31166_g0_i1		AtSWEET2	AT3G14770.1_AtSWEET2
PhAeTMT4	PhAeBC6_p_c21860_g22666_i1			TrVeSUT1.2	TrVeBC4_p_c34348_g1_i3		AtSWEET3	AT5G53190.1_AtSWEET3
PhAeTMT5	PhAeBC6_p_c21860_g22674_i3			TrVeSUT1.3	TrVeBC4_p_c36388_g4_i1		AtSWEET4	AT3G28007.1_AtSWEET4
PhAeTMT6	PhAeBC6_p_c21860_g22704_i1			AtSUT2	AT2G02860.1_ATSUC3		AtSWEET5	AT5G62850.1_AtSWEET5
StHeTMT1	StHeBC4_p_c12903_g36916_i1			MiGuSUT2	Migut.L01318.1.p		AtSWEET6	AT1G66770.1_AtSWEET6
StHeTMT2	StHeBC4_p_c12903_g9228_i1			StHeSUT2	StHeBC4_p_c26456_g1_i1		AtSWEET7	AT4G10850.1_AtSWEET7
TrVeTMT1	TrVeBC4_p_c21720_g43606_i1			PhAeSUT2	PhAeBC6_p_c24842_g5_i1		AtSWEET8	AT5G40260.1_AtSWEET8
TrVeTMT2	TrVeBC4_p_c21720_g43709_i1			TrVeSUT2	TrVeBC4_p_c34465_g5_i2		AtSWEET9	AT2G39060.1_AtSWEET9
TrVeTMT3	TrVeBC4_p_c35682_g2_i2			AtSUT4	AT1G09960.1_ATSUT4		MiGuSWEETI.1	Migut.C00032.1.p
AtINT4	AT4G16480.1_INT			MiGuSUT4.1	Migut.C00413.1.p		MiGuSWEETI.10	Migut.M00970.1.p
MiGuINT1	Migut.G01036.1.p			PhAeSUT4.1	PhAeBC6_h_c26310_g1_i1		MiGuSWEETI.2	Migut.C00153.1.p
MiGuINT2	Migut.H01614.1.p			StHeSUT4.1	StHeBC4_p_c12903_g13445_i1		MiGuSWEETI.3	Migut.C00270.1.p
MiGuINT3	Migut.M00889.1.p			StHeSUT4.2	StHeBC4_p_c12903_g39443_i1		MiGuSWEETI.4	Migut.C01104.1.p
MiGuINT4	Migut.M01415.1.p			StHeSUT4.3	StHeBC4_p_c12903_g7424_i1		MiGuSWEETI.5	Migut.C01105.1.p
MiGuINT5	Migut.N00015.1.p			TrVeSUT4.1	TrVeBC4_p_c36428_g0_i1		MiGuSWEETI.6	Migut.F00240.1.p
MiGuINT6	Migut.O00391.1.p						MiGuSWEETI.7	Migut.H00127.1.p
PhAeINT1	PhAeBC6_p_c10469_g1_i1						MiGuSWEETI.8	Migut.H02028.1.p
PhAeINT2	PhAeBC6_p_c20193_g0_i1						MiGuSWEETI.9	Migut.I00371.1.p
PhAeINT3	PhAeBC6_p_c21860_g17372_i1						MiGuSWEETII.1	Migut.A01181.1.p
StHeINT1	StHeBC4_p_c12903_g14969_i2						MiGuSWEETII.2	Migut.E00645.1.p
StHeINT2	StHeBC4_p_c12903_g21789_i1						MiGuSWEETII.3	Migut.I00025.1.p
StHeINT3	StHeBC4_p_c12903_g21840_i1						MiGuSWEETIII.1	Migut.D00153.1.p
StHeINT4	StHeBC4_p_c12903_g21842_i1						MiGuSWEETIII.10	Migut.K01029.1.p
StHeINT5	StHeBC4_p_c12903_g21844_i3						MiGuSWEETIII.11	Migut.L00805.1.p
StHeINT6	StHeBC4_p_c12903_g37510_i2						MiGuSWEETIII.12	Migut.L00912.1.p
StHeINT7	StHeBC4_p_c12903_g37605_i2						MiGuSWEETIII.13	Migut.L00926.1.p
TrVeINT1	TrVeBC4_p_c30313_g1_i8						MiGuSWEETIII.14	Migut.O00374.1.p
TrVeINT2	TrVeBC4_p_c32114_g1_i1						MiGuSWEETIII.2	Migut.D01287.1.p
TrVeINT3	TrVeBC4_p_c36858_g2_i2						MiGuSWEETIII.3	Migut.D01292.1.p
AtVGT1	AT3G03090.1_VGT						MiGuSWEETIII.4	Migut.D01551.1.p
MiGuVGT1	Migut.D00879.1.p						MiGuSWEETIII.5	Migut.E00003.1.p
MiGuVGT2	Migut.F01453.1.p						MiGuSWEETIII.6	Migut.G00918.1.p
PhAeVGT1	PhAeBC6_h_c26948_g1_i2						MiGuSWEETIII.7	Migut.H02111.1.p
PhAeVGT2	PhAeBC6_p_c21860_g12729_i3_ORF_1R						MiGuSWEETIII.8	Migut.I00563.1.p
StHeVGT1	StHeBC4_p_c12903_g3294_i1						MiGuSWEETIII.9	Migut.K00989.1.p
StHeVGT2	StHeBC4_p_c23144_g4_i1						MiGuSWEETIV.1	Migut.B01013.1.p
TrVeVGT1	TrVeBC4_p_c33711_g0_i1						MiGuSWEETIV.2	Migut.N02094.1.p
TrVeVGT2	TrVeBC4_p_c33711_g1_i1						OsSWEET1	LOC_Os01g65880.1_OsSWEET1A
TrVeVGT3	TrVeBC4_p_c33827_g0_i2						OsSWEET11	LOC_Os08g42350.1_OsSWEET11
AtGLT1	AT5G16150.3_pGLT_GLT1						OsSWEET12	LOC_Os03g22590.1_OsSWEET12
MiGuGLT1	Migut.H00224.1.p						OsSWEET13	LOC_Os12g29220.1_OsSWEET13
MiGuGLT2	Migut.L00332.1.p						OsSWEET14	LOC_Os11g31190.1_OsSWEET14
PhAeGLT1	PhAeBC6_p_c27142_g1_i1						OsSWEET15	LOC_Os02g30910.1_OsSWEET15
StHeGLT1	StHeBC4_p_c22285_g2_i2						OsSWEET16	LOC_Os03g22200.1_OsSWEET16
TrVeGLT1	TrVeBC4_p_c21720_g23622_i1						OsSWEET2	LOC_Os01g36070.1_OsSWEET2A
AtSGB1	AT1G79820.2_SGB1						OsSWEET3	LOC_Os05g12320.1_OsSWEET3A
MiGuSGB1	Migut.I00938.1.p						OsSWEET4	LOC_Os02g19820.1_OsSWEET4
MiGuSGB2	Migut.N03095.1.p						OsSWEET5	LOC_Os05g51090.1_OsSWEET5
PhAeSGB1	PhAeBC6_p_c9257_g2_i1						OsSWEET6	LOC_Os01g42110.1_OsSWEET6
StHeSGB1	StHeBC4_p_c12903_g3578_i1						OsSWEET7	LOC_Os09g08030.1_OsSWEET7
TrVeSGB1	TrVeBC4_p_c21720_g30670_i10						PhAeSWEETI.1	PhAeBC6_h_c21860_g11860_i1 ORF 0R CDS
TrVeSGB2	TrVeBC4_p_c21720_g34987_i2						PhAeSWEETI.2	PhAeBC6_p_c11109_g0_i2
AtERD6-like	AT3G05165.6_ERD6-like						PhAeSWEETI.3	PhAeBC6_p_c17858_g0_i5
MiGuERD6.1	Migut.B01284.1.p						PhAeSWEETI.4	PhAeBC6_p_c20435_g1_i1
MiGuERD6.2	Migut.C00744.2.p						PhAeSWEETI.5	PhAeBC6_p_c21860_g27181_i8
MiGuERD6.3	Migut.D01000.1.p						PhAeSWEETI.6	PhAeBC6_p_c21860_g29148_i1
MiGuERD6.4	Migut.G00231.1.p						PhAeSWEETI.7	PhAeBC6_p_c21860_g30939_i1
MiGuERD6.5	Migut.H00985.1.p						PhAeSWEETI.8	PhAeBC6_p_c23429_g1_i2
MiGuERD6.6	Migut.N00488.1.p						PhAeSWEETIII.1	PhAeBC6_h_c16338_g0_i1
PhAeERD6.1	PhAeBC6_h_c21455_g1_i3						PhAeSWEETIII.2	PhAeBC6_h_c21860_g12920_i1
PhAeERD6.2	PhAeBC6_h_c21860_g4949_i18						PhAeSWEETIII.3	PhAeBC6_p_c1377_g0_i1
PhAeERD6.3	PhAeBC6_h_c23781_g0_i1						PhAeSWEETIII.4	PhAeBC6_p_c1780_g2_i3
PhAeERD6.4	PhAeBC6_p_c21860_g1247_i2						PhAeSWEETIII.5	PhAeBC6_p_c21860_g12917_i1 ORF 1F NT
PhAeERD6.5	PhAeBC6_p_c21860_g4540_i2						PhAeSWEETIII.6	PhAeBC6_p_c646_g0_i1
StHeERD6.1	StHeBC4_p_c11417_g15_i3						StHeSWEETI.1	StHeBC4_h_c13496_g0_i1
StHeERD6.2	StHeBC4_p_c11417_g4_i1_ORF_2R						StHeSWEETI.2	StHeBC4_h_c25056_g0_i1
StHeERD6.3	StHeBC4_p_c12903_g20243_i1						StHeSWEETI.3	StHeBC4_p_c17933_g0_i1
StHeERD6.4	StHeBC4_p_c12903_g3054_i4						StHeSWEETI.4	StHeBC4_p_c18261_g0_i1
StHeERD6.5	StHeBC4_p_c12903_g3332_i2						StHeSWEETI.5	StHeBC4_p_c18492_g0_i1
StHeERD6.6	StHeBC4_p_c12903_g40047_i1						StHeSWEETI.6	StHeBC4_p_c19212_g0_i1
StHeERD6.7	StHeBC4_p_c12903_g4872_i3						StHeSWEETI.7	StHeBC4_p_c25056_g1_i1
StHeERD6.8	StHeBC4_p_c25647_g2_i1						StHeSWEETI.8	StHeBC4_p_c25940_g0_i1
TrVeERD6.1	TrVeBC4_p_c21720_g4256_i4						StHeSWEETII.1	StHeBC4_p_c12903_g27709_i1
TrVeERD6.2	TrVeBC4_p_c21720_g45094_i1						StHeSWEETII.2	StHeBC4_p_c12903_g28100_i1 ORF 2R NT
TrVeERD6.3	TrVeBC4_p_c29499_g1_i1						StHeSWEETII.3	StHeBC4_p_c12903_g30013_i2
TrVeERD6.4	TrVeBC4_p_c29499_g8_i1						StHeSWEETII.4	StHeBC4_p_c13805_g0_i1
TrVeERD6.5	TrVeBC4_p_c30396_g0_i1						StHeSWEETII.5	StHeBC4_p_c9706_g0_i1
TrVeERD6.6	TrVeBC4_p_c35862_g0_i1						StHeSWEETIII.1	StHeBC4_h_c11741_g0_i1
AtPMT1	AT2G16120.1_PMT						StHeSWEETIII.10	StHeBC4_p_c25507_g0_i1
MiGuPMT1	Migut.B00257.1.p						StHeSWEETIII.2	StHeBC4_p_c10802_g0_i1
MiGuPMT2	Migut.H01006.1.p						StHeSWEETIII.3	StHeBC4_p_c12903_g10189_i1
MiGuPMT3	Migut.H01068.1.p						StHeSWEETIII.4	StHeBC4_p_c12903_g15743_i1
MiGuPMT4	Migut.K00074.1.p						StHeSWEETIII.5	StHeBC4_p_c12903_g1704_i1
MiGuPMT5	Migut.K00454.1.p						StHeSWEETIII.6	StHeBC4_p_c12903_g17584_i2
MiGuPMT6	Migut.M01178.1.p						StHeSWEETIII.7	StHeBC4_p_c12903_g35467_i1
MiGuPMT7	Migut.N01228.1.p						StHeSWEETIII.8	StHeBC4_p_c12903_g4682_i1
PhAePMT1	PhAeBC6_h_c26265_g12_i1						StHeSWEETIII.9	StHeBC4_p_c16453_g0_i1
PhAePMT2	PhAeBC6_h_c26265_g22_i4						StHeSWEETIV.1	StHeBC4_p_c11758_g0_i1
PhAePMT3	PhAeBC6_h_c26265_g24_i3						StHeSWEETIV.2	StHeBC4_p_c12610_g0_i2
PhAePMT4	PhAeBC6_h_c26265_g6_i1						TrVeSWEETI.1	TrVeBC4_p_c21720_g31351_i1
PhAePMT5	PhAeBC6_p_c17878_g1_i2						TrVeSWEETI.2	TrVeBC4_p_c22174_g0_i1
PhAePMT6	PhAeBC6_p_c21860_g4758_i1						TrVeSWEETI.3	TrVeBC4_p_c28052_g0_i1
PhAePMT7	PhAeBC6_p_c26149_g0_i1						TrVeSWEETI.4	TrVeBC4_p_c30176_g0_i2
StHePMT1	StHeBC4_p_c12903_g38273_i3						TrVeSWEETI.5	TrVeBC4_p_c37023_g0_i1
StHePMT2	StHeBC4_p_c12903_g489_i1						TrVeSWEETII.1	TrVeBC4_p_c23084_g0_i1
StHePMT3	StHeBC4_p_c12903_g9869_i1						TrVeSWEETII.2	TrVeBC4_p_c28021_g20_i1
StHePMT4	StHeBC4_p_c12903_g9881_i6						TrVeSWEETII.3	TrVeBC4_p_c6487_g0_i1
StHePMT5	StHeBC4_p_c12903_g9892_i1						TrVeSWEETIII.1	TrVeBC4_p_c21720_g13978_i1
StHePMT6	StHeBC4_p_c12903_g9903_i1						TrVeSWEETIII.2	TrVeBC4_p_c24134_g0_i1
StHePMT7	StHeBC4_p_c12903_g9908_i3						TrVeSWEETIII.3	TrVeBC4_p_c25307_g0_i1
StHePMT8	StHeBC4_p_c12903_g9909_i1						TrVeSWEETIII.4	TrVeBC4_p_c26072_g0_i1
StHePMT9	StHeBC4_p_c12903_g9915_i2						TrVeSWEETIII.5	TrVeBC4_p_c26829_g0_i1
StHePMT10	StHeBC4_p_c12903_g9928_i1
StHePMT11	StHeBC4_p_c12903_g9934_i1
StHePMT12	StHeBC4_p_c12903_g9946_i2
StHePMT13	StHeBC4_p_c12903_g9947_i1
StHePMT14	StHeBC4_p_c12903_g9948_i1
StHePMT15	StHeBC4_p_c12903_g9951_i1
StHePMT16	StHeBC4_p_c12903_g9961_i1
StHePMT17	StHeBC4_p_c12903_g9964_i1
StHePMT18	StHeBC4_p_c12903_g9965_i1
StHePMT19	StHeBC4_p_c12903_g9968_i1
StHePMT20	StHeBC4_p_c23852_g2_i1
TrVePMT1	TrVeBC4_p_c21720_g12382_i1
TrVePMT2	TrVeBC4_p_c21720_g12497_i3
TrVePMT3	TrVeBC4_p_c21720_g13566_i1
TrVePMT4	TrVeBC4_p_c21720_g19153_i1
TrVePMT5	TrVeBC4_p_c21720_g29369_i1
TrVePMT6	TrVeBC4_p_c21720_g29385_i3
TrVePMT7	TrVeBC4_p_c21720_g32851_i1
TrVePMT8	TrVeBC4_p_c21720_g33463_i2
TrVePMT9	TrVeBC4_p_c21720_g35335_i1
TrVePMT10	TrVeBC4_p_c21720_g39051_i1
TrVePMT11	TrVeBC4_p_c21720_g40286_i5
TrVePMT12	TrVeBC4_p_c21720_g43177_i2
TrVePMT13	TrVeBC4_p_c21720_g43179_i2
TrVePMT14	TrVeBC4_p_c21720_g43241_i3
TrVePMT15	TrVeBC4_p_c21720_g45016_i1
TrVePMT16	TrVeBC4_p_c21720_g45294_i1
TrVePMT17	TrVeBC4_p_c21720_g45960_i1
TrVePMT18	TrVeBC4_p_c21720_g46018_i2
TrVePMT19	TrVeBC4_p_c21720_g5247_i2
TrVePMT20	TrVeBC4_p_c21720_g9473_i1
TrVePMT21	TrVeBC4_p_c28557_g0_i2
TrVePMT22	TrVeBC4_p_c29830_g2_i1
TrVePMT23	TrVeBC4_p_c36380_g7_i4
AtSTP5	AT1G34580.1_STP
MiGuSTP1	Migut.A00922.1.p
MiGuSTP2	Migut.D00861.1.p
MiGuSTP3	Migut.E00689.1.p
MiGuSTP4	Migut.F00507.1.p
MiGuSTP5	Migut.F00508.1.p
MiGuSTP6	Migut.F00509.1.p
MiGuSTP7	Migut.G00320.1.p
MiGuSTP8	Migut.G00321.1.p
MiGuSTP9	Migut.G00323.1.p
MiGuSTP10	Migut.H01520.1.p
MiGuSTP11	Migut.J01280.1.p
MiGuSTP12	Migut.K00365.1.p
MiGuSTP13	Migut.K00520.1.p
MiGuSTP14	Migut.L00305.1.p
MiGuSTP15	Migut.L00722.1.p
MiGuSTP16	Migut.L00863.1.p
MiGuSTP17	Migut.M01220.1.p
PhAeSTP1	PhAeBC6_h_c21860_g5272_i2
PhAeSTP2	PhAeBC6_p_c18569_g0_i1
PhAeSTP3	PhAeBC6_p_c1861_g19_i2
PhAeSTP4	PhAeBC6_p_c1861_g8_i1
PhAeSTP5	PhAeBC6_p_c20425_g0_i1
PhAeSTP6	PhAeBC6_p_c21860_g23127_i2
PhAeSTP7	PhAeBC6_p_c21860_g3314_i5
PhAeSTP8	PhAeBC6_p_c21860_g7894_i6
PhAeSTP9	PhAeBC6_p_c25967_g0_i3
StHeSTP1	StHeBC4_p_c12436_g0_i2
StHeSTP2	StHeBC4_p_c12651_g0_i2
StHeSTP3	StHeBC4_p_c12903_g12753_i3
StHeSTP4	StHeBC4_p_c12903_g15662_i1
StHeSTP5	StHeBC4_p_c12903_g19845_i1
StHeSTP6	StHeBC4_p_c12903_g20548_i1
StHeSTP7	StHeBC4_p_c12903_g22376_i2
StHeSTP8	StHeBC4_p_c12903_g23379_i1
StHeSTP9	StHeBC4_p_c12903_g23472_i2
StHeSTP10	StHeBC4_p_c12903_g26378_i1
StHeSTP11	StHeBC4_p_c12903_g27684_i1
StHeSTP12	StHeBC4_p_c12903_g28853_i2
StHeSTP13	StHeBC4_p_c12903_g32960_i1
StHeSTP14	StHeBC4_p_c12903_g33931_i3
StHeSTP15	StHeBC4_p_c12903_g35824_i1
StHeSTP16	StHeBC4_p_c12903_g38819_i1
StHeSTP17	StHeBC4_p_c12903_g39665_i1
StHeSTP18	StHeBC4_p_c12903_g7518_i1
StHeSTP19	StHeBC4_p_c12903_g8196_i1
StHeSTP20	StHeBC4_p_c14192_g0_i1
StHeSTP21	StHeBC4_p_c17811_g0_i1
StHeSTP22	StHeBC4_p_c22074_g1_i1
StHeSTP23	StHeBC4_p_c25920_g1_i1
StHeSTP24	StHeBC4_p_c9523_g0_i1
StHeSTP25	StHeBC4_p_c9745_g1_i1
TrVeSTP1	TrVeBC4_h_c68_g0_i1_ORF_0R_CDS
TrVeSTP2	TrVeBC4_p_c16707_g2_i2
TrVeSTP3	TrVeBC4_p_c20830_g2_i7
TrVeSTP4	TrVeBC4_p_c21380_g0_i1
TrVeSTP5	TrVeBC4_p_c21720_g17026_i4
TrVeSTP6	TrVeBC4_p_c21720_g17120_i1
TrVeSTP7	TrVeBC4_p_c21720_g17131_i3
TrVeSTP8	TrVeBC4_p_c21720_g17134_i1
TrVeSTP9	TrVeBC4_p_c21720_g17135_i3
TrVeSTP10	TrVeBC4_p_c21720_g17137_i1
TrVeSTP11	TrVeBC4_p_c21720_g17138_i8
TrVeSTP12	TrVeBC4_p_c21720_g17143_i1
TrVeSTP13	TrVeBC4_p_c21720_g17146_i4
TrVeSTP14	TrVeBC4_p_c21720_g17157_i1
TrVeSTP15	TrVeBC4_p_c21720_g17159_i1
TrVeSTP16	TrVeBC4_p_c21720_g7898_i2
TrVeSTP17	TrVeBC4_p_c25002_g5_i1
TrVeSTP18	TrVeBC4_p_c25185_g3_i1
TrVeSTP19	TrVeBC4_p_c25185_g6_i1
TrVeSTP20	TrVeBC4_p_c25185_g7_i1
TrVeSTP21	TrVeBC4_p_c32493_g12_i1
TrVeSTP22	TrVeBC4_p_c3595_g0_i1
